# Supplementary material for: An Analysis of Cloud Microphysical Features over UAE Using Multiple Data Sources
Source: Copernicus journal article supplement (doi:10.5194/egusphere-2024-1400), 2024-06-03
Supplement: Supplementary file 1 [file egusphere-2024-1400-supplement.pdf]

## Supplement

### The Potential Usage of Radar Reflectivity

In addition to the satellite data, the C-band weather radars in the UAE provide another  
1050 data source to detect cloud features. However, only the radar in Al Ain overlaps with the  
observation area of three research flights (SF03, SF06, and SF07) and offers continuous vertical  
profiles of reflectivity. We explored the potential relationship between the radar reflectivity and  
the cloud's microphysical features. Figure S1a shows the vertical radar reflectivity profiles at the  
exact location and at the same time with some CPs from SF03, which has the best overlap with  
1055 the radar data. The reflectivity profiles for the other CPs are not included due to the lack of  
overlap between the datasets, which might be due to the far distance (around or further than 100  
km) from the radar to the locations of those CPs. The reflectivity profiles are categorized into  
two groups (red and blue) according to their features. The red group captured the reflectivity  
from ~3.5 km to 13 km, which overlaps (~3.5 – nearly 7.0 km) with the aircraft measurements.  
1060 In those profiles, the reflectivity value increases with height from ~3.5 km to nearly 7.0 km,  
related to the increase of cloud particle size with height in the cloud case SF03, as described in  
Section 3. At the maximum reflectivity near 7 km, the aircraft captured several large ice cloud  
particles in the 2DS images with 2DS particle concentration reaching 227 per liter at a  
temperature of -12.9 °C (e.g., Figure S1b). In this cloud case, the maximum reflectivity around 7  
1065 km height is a critical layer for ice production. The blue group of reflectivity profiles has little  
data below 7 km, which means no overlap with the aircraft measurements. Thus, estimating any  
relationship between those reflectivity profiles and cloud features observed by aircraft is not  
appropriate.

The radar data could be a valuable source for refining the 5-zone framework. However,  
1070 the limited number of available samples makes it difficult to build a connection between the  
radar data and the cloud microphysical zones. More studies are needed to investigate the  
potential usage of radar data in detecting the cloud microphysical zones.

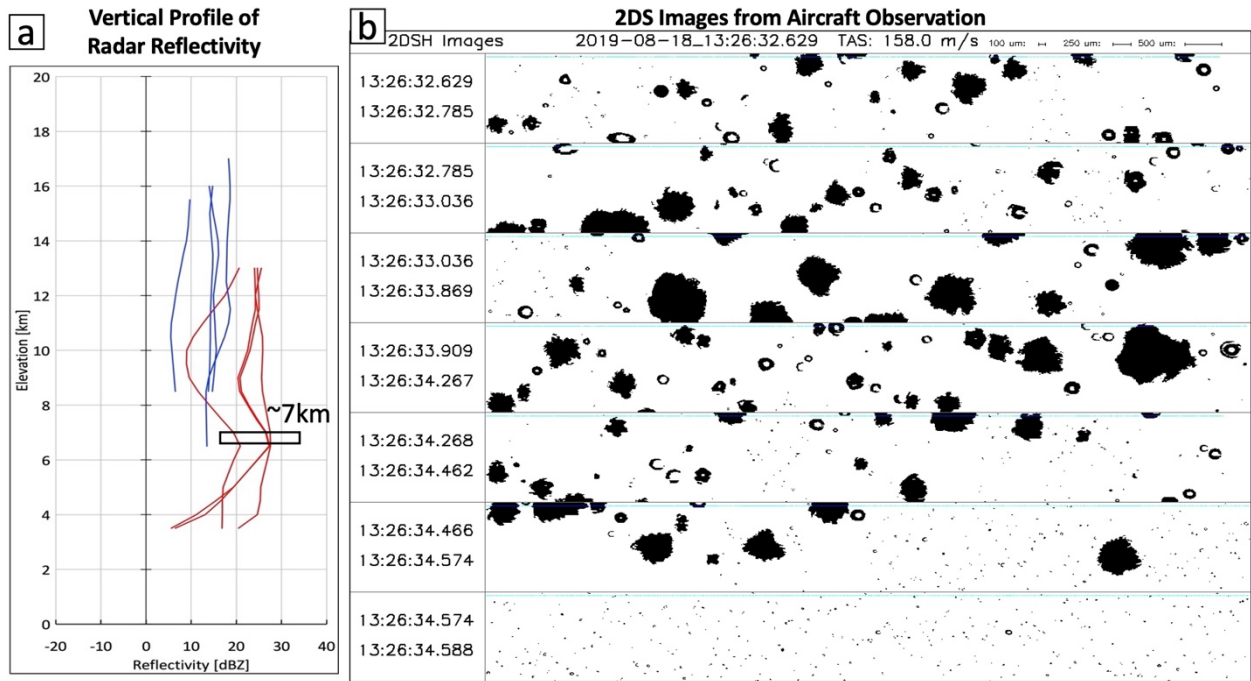

1075 Figure S1. (a) The vertical profiles of radar reflectivity for cloud penetrations in SF03 from the C-band weather radar at Al Ain. (b) The 2-DS image from the aircraft observation at about 7 km elevation.

1080
